# Supplementary material for: A unifying mechanism for the biogenesis of membrane proteins co-operatively integrated by the Sec and Tat pathways
Source: eLife. 2017 May 17;6:e26577. doi: 10.7554/eLife.26577 (PMC5449189; doi:10.7554/eLife.26577)
Supplement: Figure 2—source data 2. — DOI: http://dx.doi.org/10.7554/eLife.26577.013 [file elife-26577-fig2-data2.xlsx]

## Sheet: Quantification of truncations
Quantification of Rieske-Bla variants Tat- strain										A	B	C	D	Average	s.e.m
A									∆123-157	152.795	171.623	109.605	187.342	155.341	16.8013
	Area	area-bkg	BamA	normalised	% of WT				∆118-152	247.595	276.182	239.025	220.793	245.899	11.538
pSUPROM	0								∆118-153	318.157	273.282	130.919	279.301	250.415	41.0544
Rieske-Bla	9204.97	9204.97	5508.32	1.6711					∆118-154	447.718	285.652	188.235	203.379	281.246	59.4746
∆123-157	9717.51	9717.51	3805.76	2.55337	152.795				∆118-155	109.78	294.42	170.732	214.618	197.387	38.8348
∆118-152	16877.2	16877.2	4079	4.13758	247.595				∆118-156	247.455	184.137	246.185	189.756	216.883	17.324
∆118-153	19408.6	19408.6	3650.47	5.31673	318.157				∆118-157	208.462	322.611	268.515	224.045	255.908	25.6166
∆118-154	14910.5	14910.5	1992.89	7.48183	447.718
∆118-155	6356.73	6356.73	3465.03	1.83454	109.78
∆118-156	10189	10189	2463.96	4.13523	247.455				Removal of outliers:
∆118-157	9912.22	9912.22	2845.38	3.48362	208.462
										A	B	C	D	Average	s.e.m
B									∆123-157	152.795	171.623		187.342	170.587	9.98632
	Area	area-bkg	BamA	normalised	% of WT				∆118-152	247.595		239.025	220.793	235.804	7.90308
pSUPROM									∆118-153	318.157	273.282		279.301	290.247	14.0627
Rieske-Bla	4714.2	4714.2	4533.3	1.0399					∆118-154		285.652	188.235	203.379	225.755	30.2657
∆123-157	10323.1	10323.1	5784.18	1.78471	171.623				∆118-155	109.78		170.732	214.618	165.043	30.3976
∆118-152	17593.3	17593.3	6125.75	2.87203	276.182				∆118-156	247.455	184.137	246.185	189.756	216.883	17.324
∆118-153	19521.8	19521.8	6869.34	2.84188	273.282				∆118-157	208.462		268.515	224.045	233.674	17.9918
∆118-154	19361.8	19361.8	6518.02	2.97051	285.652
∆118-155	17131.1	17131.1	5595.32	3.06168	294.42
∆118-156	10292.4	10292.4	5375.02	1.91485	184.137
∆118-157	14557.1	14557.1	4339.12	3.35484	322.611
C
	Area	area-bkg	BamA	normalised	% of WT
pSUPROM
Rieske-Bla	6053.78	6053.78	4401.59	1.37536
∆123-157	6184.54	6184.54	4102.59	1.50747	109.605
∆118-152	12527.2	12527.2	3810.59	3.28746	239.025
∆118-153	9175.17	9175.17	5095.59	1.80061	130.919
∆118-154	11710.9	11710.9	4523.49	2.58891	188.235
∆118-155	10969.1	10969.1	4671.32	2.34818	170.732
∆118-156	9587.77	9587.77	2831.64	3.38594	246.185
∆118-157	15542.4	15542.4	4208.54	3.69305	268.515
D	Area	area-bkg	BamA	normalised	% of WT
pSUPROM
Rieske-Bla	6053.78	6053.78	4401.59	1.37536
∆123-157	7434.8	7434.8	2885.47	2.57664	187.342
∆118-152	13762.9	13762.9	4532.2	3.0367	220.793
∆118-153	18363.6	18363.6	4780.44	3.8414	279.301
∆118-154	12782.2	12782.2	4569.66	2.79719	203.379
∆118-155	13381.9	13381.9	4533.49	2.95178	214.618
∆118-156	16700.5	16700.5	6399.1	2.60983	189.756
∆118-157	18202.3	18202.3	5907.1	3.08143	224.045
