# Supplementary material for: A unifying mechanism for the biogenesis of membrane proteins co-operatively integrated by the Sec and Tat pathways
Source: eLife journal article supplement (doi:10.7554/elife.26577), 2017-05-17
Supplement: supp [file elife-26577-supp-v1.zip]

|                                         | <u>2<sup>nd</sup>TMD</u> | <u>predicted <math>\alpha</math>-helical region</u> | <u>3<sup>rd</sup> TMD</u> |                        |                  |           |     |
|-----------------------------------------|--------------------------|-----------------------------------------------------|---------------------------|------------------------|------------------|-----------|-----|
| <i>Streptomyces coelicolor</i>          | 115                      | GAVHWARTLMSDEEVADERHP                               | IEASPEVR                  | AKVHADFKQGAKESVIGRRKLI | RNTMLGALT        | 174       |     |
| <i>Streptomyces sp.</i>                 | 102                      | GVILYTKKFVPHEVAVQQRSDG                              | PSAEVDRATIL               | AHLADAGTRNGIARRSLIKRT  | AGAGAG           | 161       |     |
| <i>Mycobacterium tuberculosis</i>       | 153                      | GAVLYQKRFIPEEISIQERHD                               | GASREIDRKT                | VVANLTDAFEGSTIRRRKLI   | GLSFGVGMG        | 212       |     |
| <i>Corynebacterium glutamicum</i>       | 113                      | AVVLYVKKFIPEEIAVQRRHD                               | GDPSEEVDRRTI              | VALLNDSWQSTLGRKKLI     | MGLAGGGAV        | 172       |     |
| <i>Corynebacterium diphtheriae</i>      | 113                      | GVIFYIKKIIIPSEISVQRRHD                              | GDPSEEDRRTI               | TALLNDSWETSTLGRKKVL    | KSMLGIGGV        | 172       |     |
| <i>Gordonia malaquae</i>                | 113                      | GVIQISKRFIPQEISVQDRHD                               | GSGTEVDKQTI               | VAELSDLTQSTLPRRKMI     | IGSAVFGVG        | 172       |     |
| <i>Rhodococcus erythropolis</i>         | 97                       | GAVQFTKKFIPEEVSQDRHD                                | GSGTEVDRRTI               | VAELGDTLETSTLPRRKAI    | KRSLMFGGG        | 156       |     |
| <i>Dietzia cinnamea</i>                 | 113                      | GAVQFTKKFVPEEISVQTRHD                               | GVSDVDRRTI                | VAELNDSWKTSTIGRRKVM    | GGFLGAGVG        | 172       |     |
| <i>Salinispora tropica</i>              | 113                      | GILTWGKKLLPKEVSVQDRHE                               | GAVNERDRTI                | TAQTMLYMADELGVKRRPLL   | GVSLLAGLA        | 172       |     |
| <i>Stackebrandtia nassauensis</i>       | 113                      | GILTWAKKLLPKEELVQDRHD                               | GSGSEEDRKIT               | GATVSNVDETGIKRRPML     | KRALLFGSA        | 172       |     |
| <i>Verrucosipora maris</i>              | 111                      | GILTWGKKLLPKEVSIQDRHE                               | GAVSADDQRTI               | TGQTMAYMADELGVKRRPLL   | GVSLLAGLA        | 170       |     |
| <i>Blastococcus saxosidens</i>          | 133                      | GLVLYTKKLLPHETAVQDKHDG                              | --SHFDRVTTG               | ATLVGGYHNSGLPRRKLI     | TRSLGFMGA        | 190       |     |
| <i>Acidothermus cellulolyticus</i>      | 93                       | GLIGWVRWLMPAHETVEERH                                | SLASPERDVAAA              | ADIVMTGFRETGLPRRSL     | LKRTLGLAAG       | 152       |     |
| <i>Kineococcus radiotolerans</i>        | 107                      | GAVHWAKTLMPPDDERIDYRHR                              | QRGTTAERAEAVAIL           | KEGAAEAGLGRRPLIR       | NTLIGALA         | 166       |     |
| <i>Propionibacterium acnes</i>          | 95                       | ACIHWAKQIMGDEEI                                     | IQERHPVNSDAT              | RKEFAKQWRI             | GAEQSGLSRRKLI    | GGALGGAIG | 154 |
| <i>Brachybacterium muris</i>            | 111                      | AAVHWAKTLMPPDDEVVEERH                               | PIRSTDES                  | RGAAVDIITGGLDESGI      | GRRPLIVTSMVA     | ALA       | 170 |
| <i>Actinokineospora spheciospongiae</i> | 115                      | AALLYTKKFIPHEVAVQQRHE                               | GSGTEVDKATFA              | AHLADAGVRSTIGRRSLI     | KRTAGLGAG        | 174       |     |
| <i>Kibdelosporangium sp.</i>            | 114                      | GVVMYAKKFLPHEVAVQQRH                                | GGRSSELD                  | RQTFVAHLSDAGDRSTI      | ARRSIIKRSALFGAG  | 173       |     |
| <i>Pseudonocardia dioxanivorans</i>     | 119                      | GVISYVKKFFPSEVSVQQRHD                               | GPSDEVARRTVMAQ            | LAAAGKDTT              | IARRTVIKRSAGAAAG | 178       |     |
