# Supplementary figures and images for: A unifying mechanism for the biogenesis of membrane proteins co-operatively integrated by the Sec and Tat pathways
Source: eLife journal article supplement (doi:10.7554/elife.26577), 2017-05-17

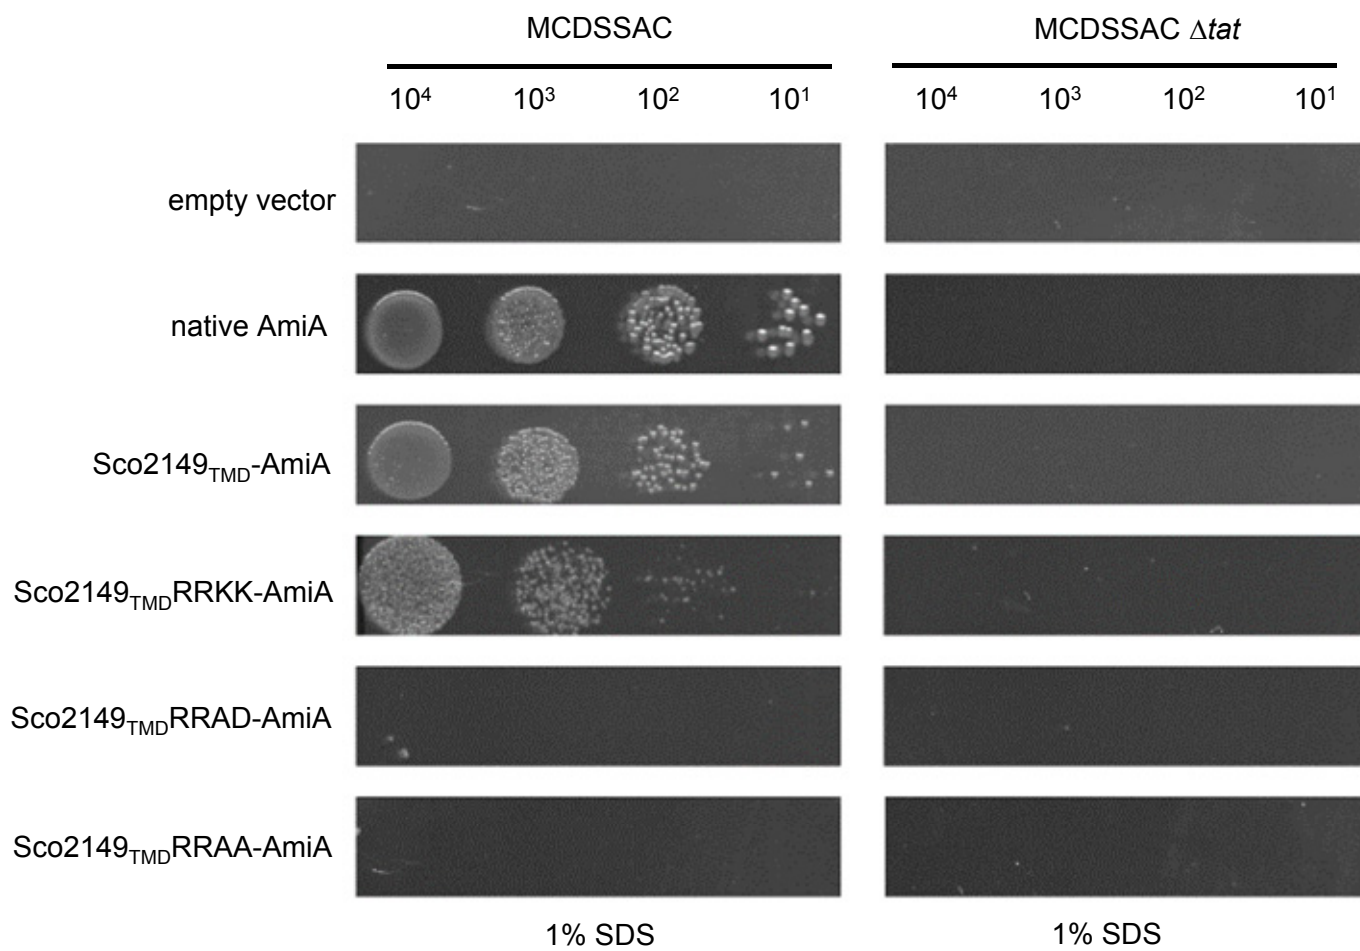

Supplement: supp [file elife-26577-supp-v1.zip]

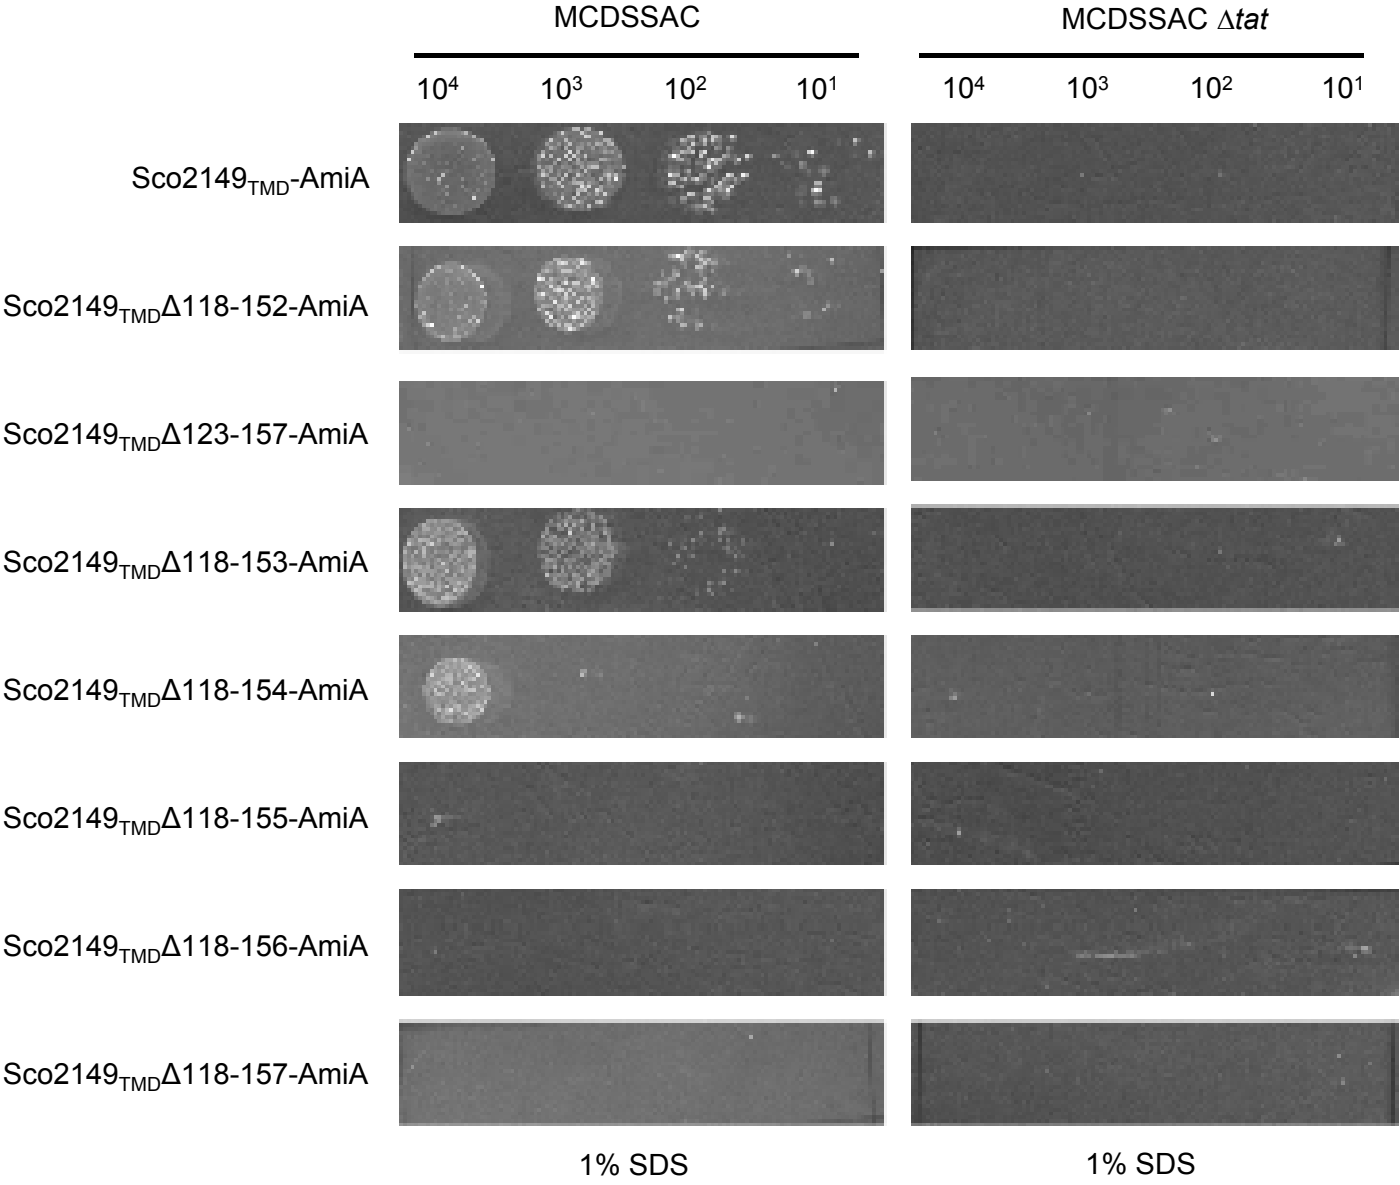

Supplement: supp [file elife-26577-supp-v1.zip]
